# Supplementary material
Source: MDPI journal article supplement (https://www.mdpi.com/2073-4395/13/5/1281)
Supplement: s1 [file s1]

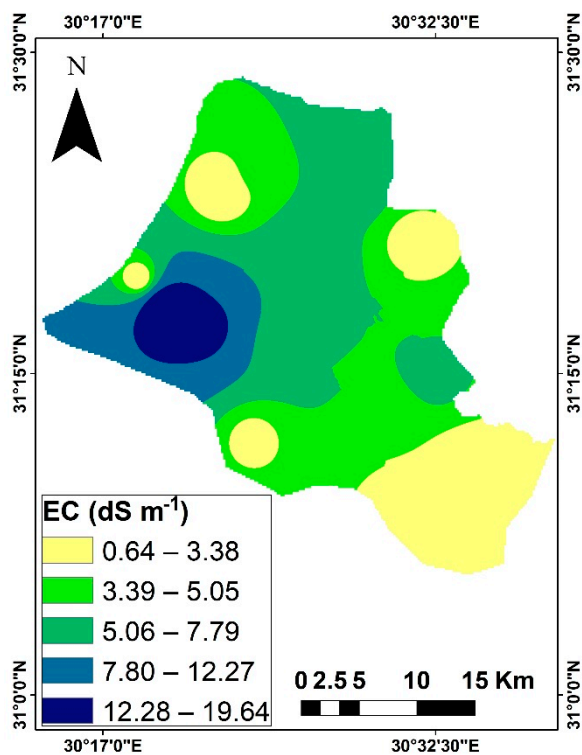

(a)

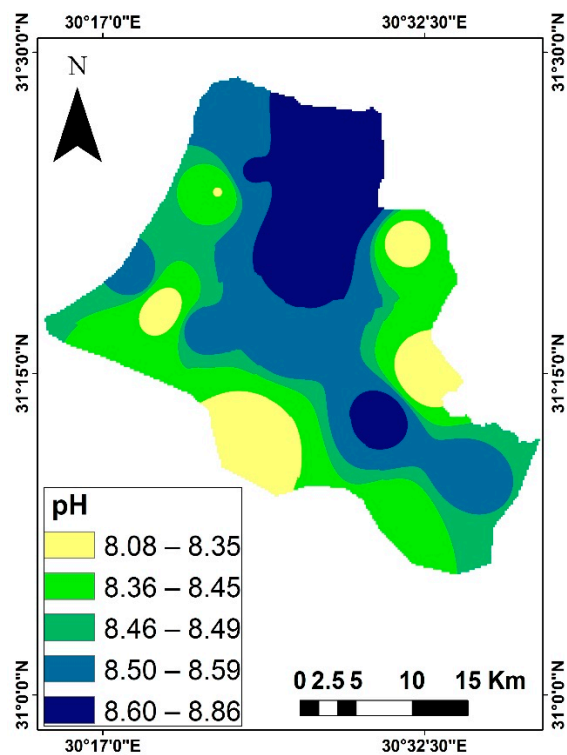

(b)

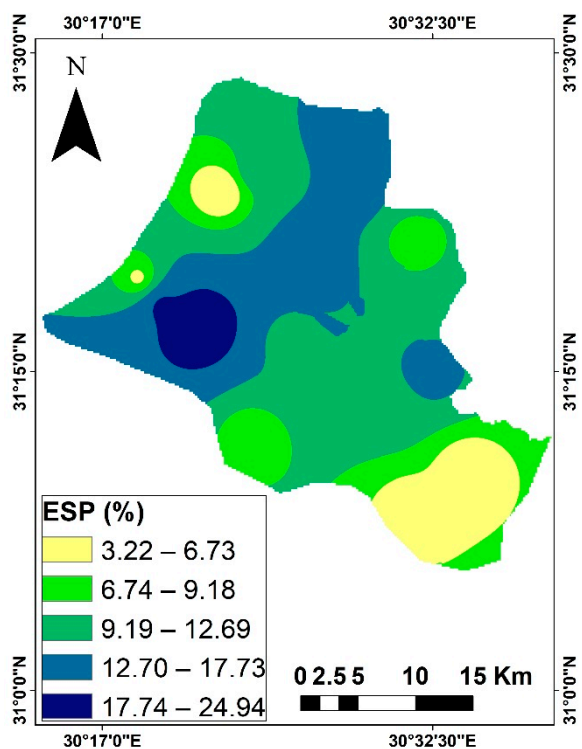

(c)

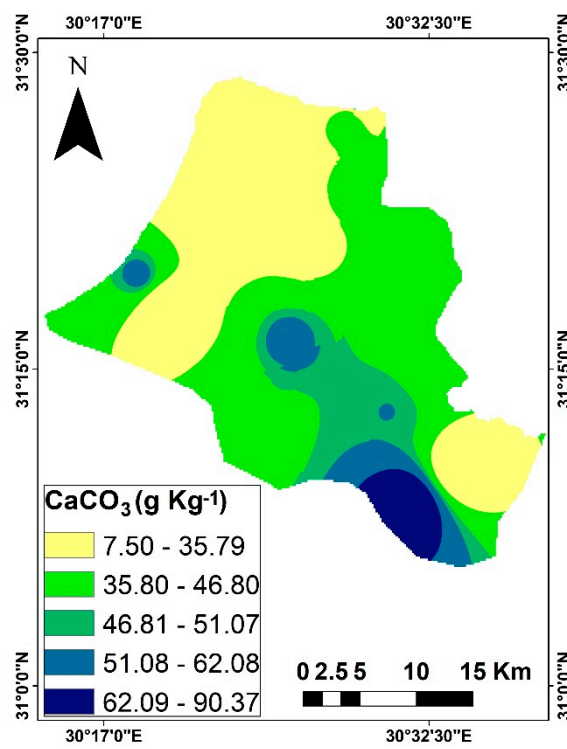

(d)

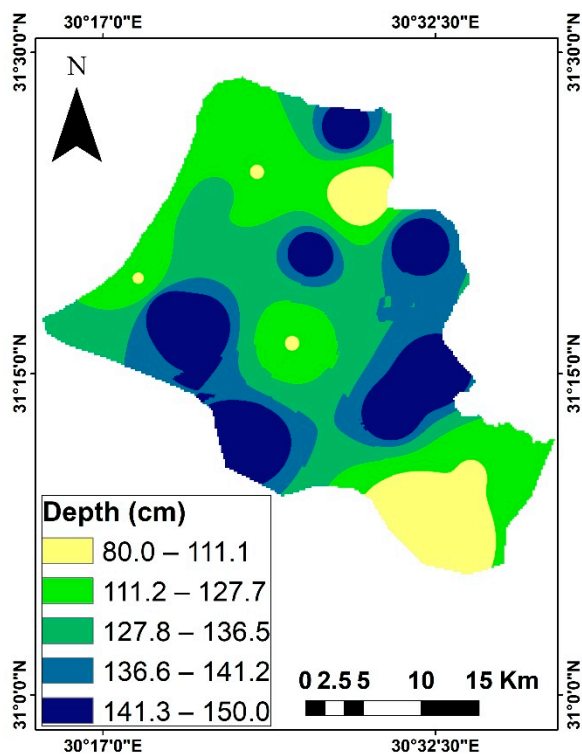

(e)

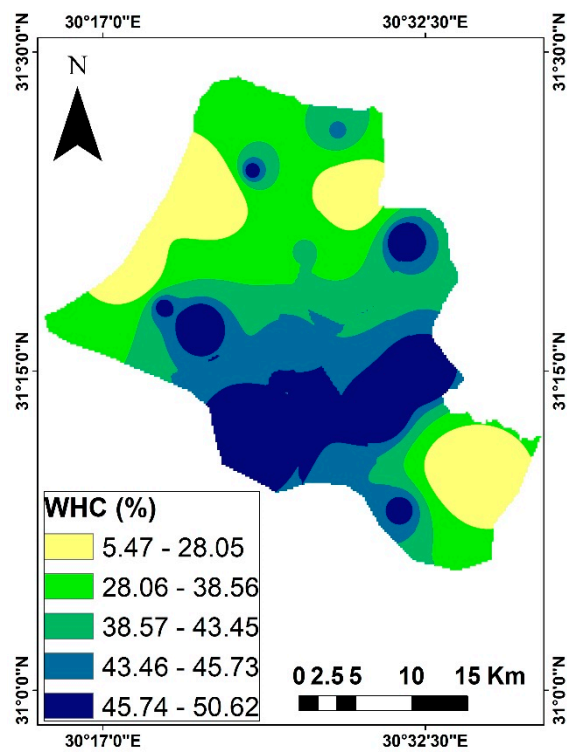

(f)

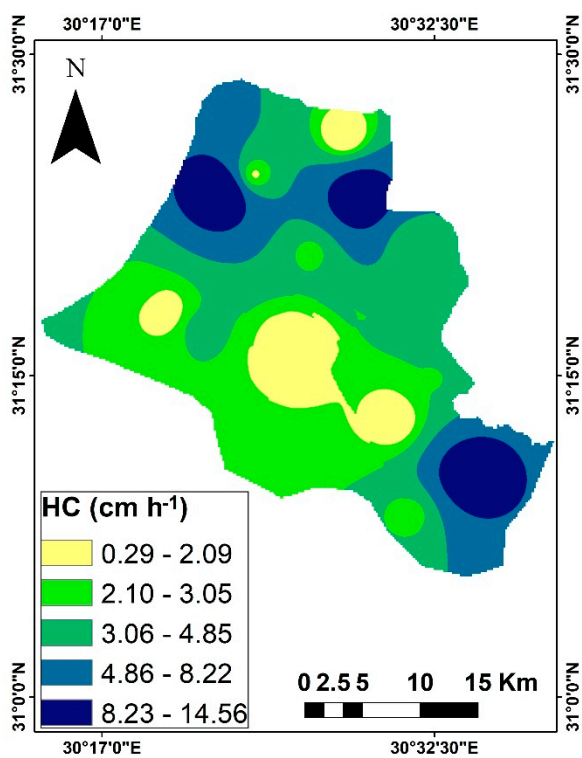

(g)

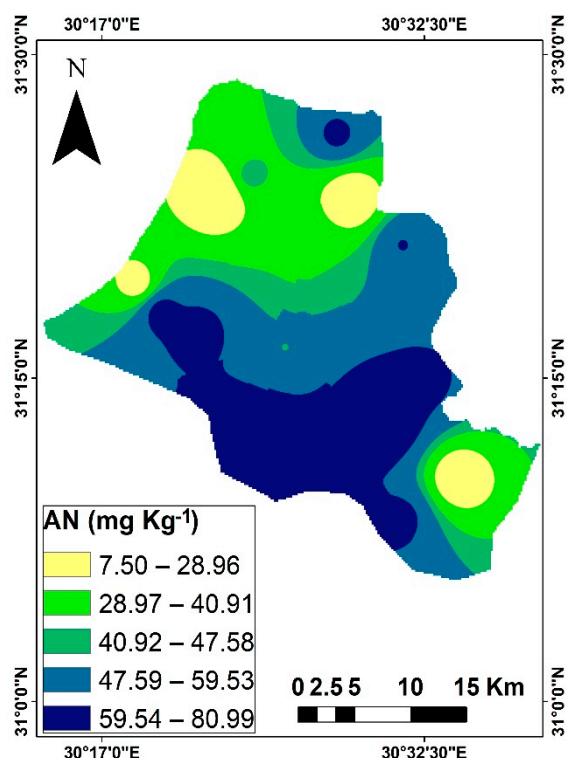

(h)

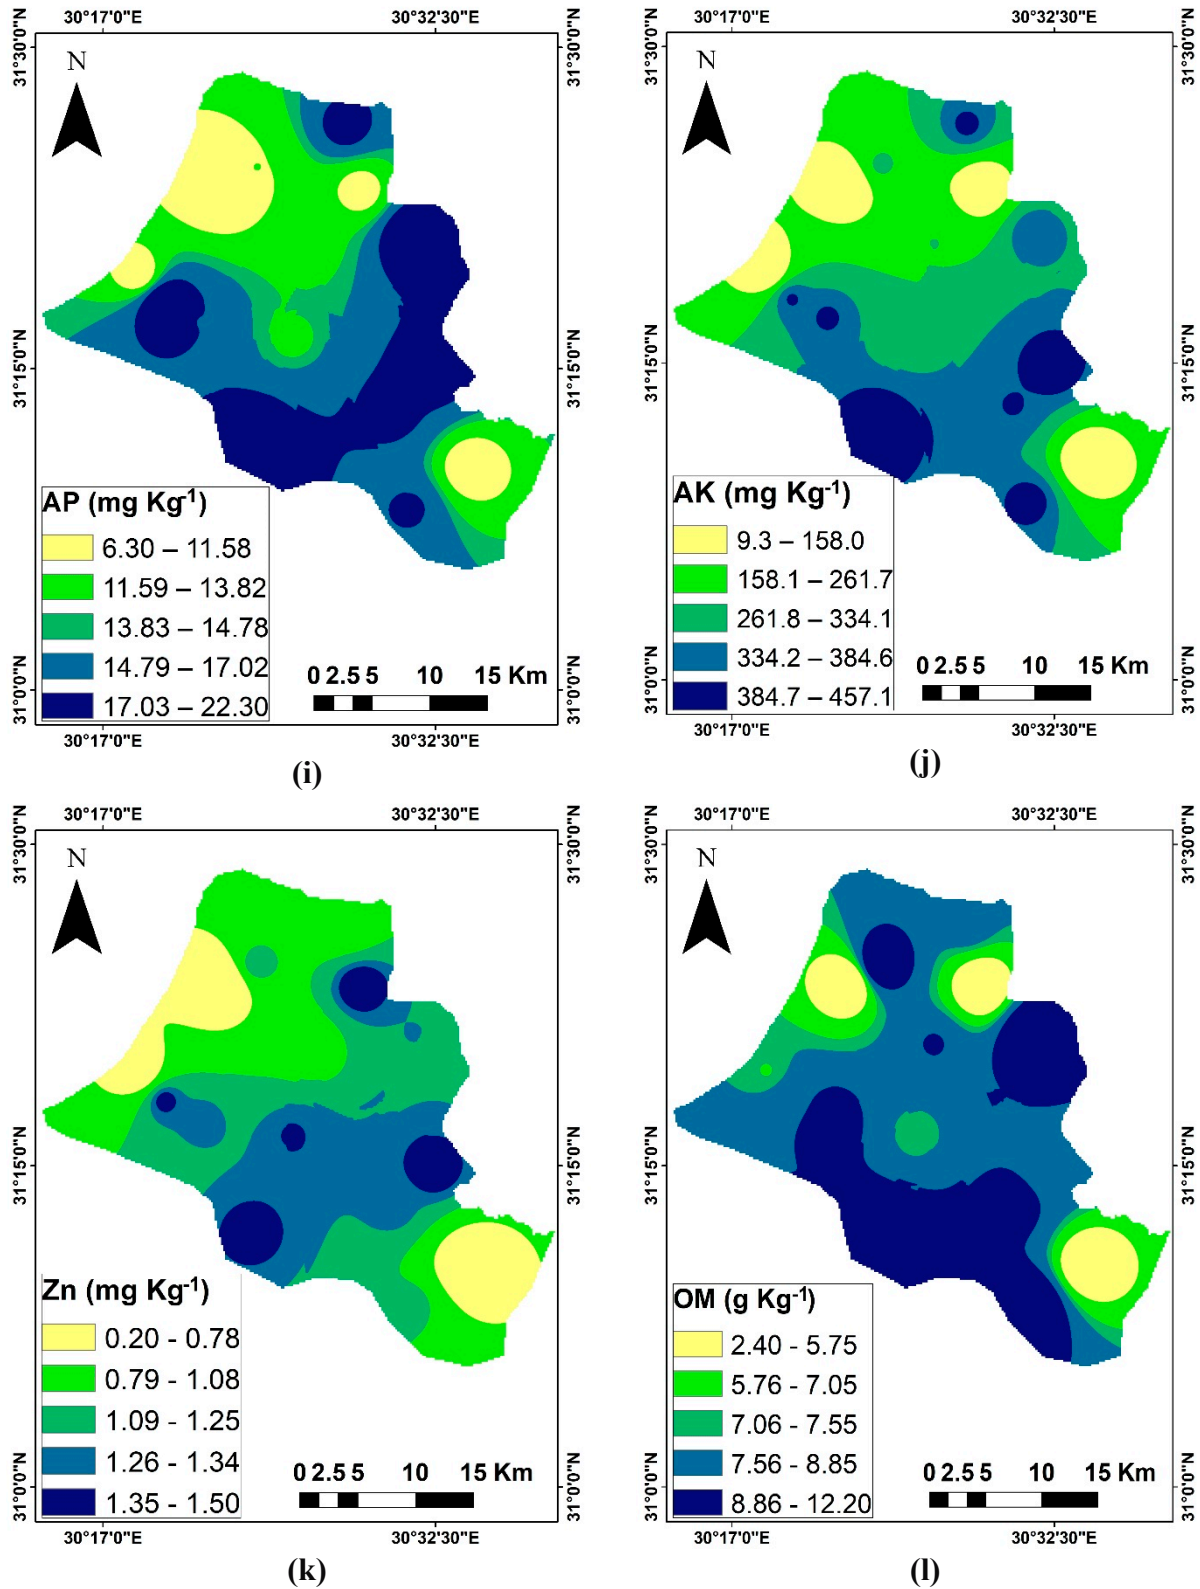

**Figure S1.** Spatial distribution of some chemical, physical and fertility soil properties (a) electric conductivity (EC: dS m<sup>-1</sup>), (b) soil reaction (pH), (c) exchangeable sodium percent (ESP: %), (d) calcium carbonate percentage (CaCO<sub>3</sub>: g Kg<sup>-1</sup>), (e) depth (cm), (f) water holding capacity (WHC: %), (g) hydraulic conductivity (HC: cm h<sup>-1</sup>), (h) available N (AN: mg Kg<sup>-1</sup>), (i) available P (AP: mg Kg<sup>-1</sup>), (j) available K (AK: mg Kg<sup>-1</sup>), (k) Zinc (Zn: mg Kg<sup>-1</sup>) and (l) organic matter (OM: g Kg<sup>-1</sup>)

**Table S1.** Factor score of soil suitability parameters for wheat crop in the study area.

| Soil parameter               | Unit                | Factor Score          |                  |            |           |
|------------------------------|---------------------|-----------------------|------------------|------------|-----------|
|                              |                     | 1.0                   | 0.8              | 0.5        | 0.2       |
| Chemical properties          |                     |                       |                  |            |           |
| EC                           | dS m <sup>-1</sup>  | < 4                   | 4–8              | 8–16       | > 16      |
| pH                           | -                   | 5.5–7                 | 7–7.8            | 7.9–8.5    | > 8.5     |
| ESP                          | %                   | < 10                  | 10–15            | 15–20      | > 20      |
| CaCO <sub>3</sub>            | g Kg <sup>-1</sup>  | < 50                  | 50–100           | 100–150    | > 150     |
| Physical properties          |                     |                       |                  |            |           |
| Drainage (R )                | -                   | Well                  | Moderate         | Poor       | Very poor |
| Texture (T)                  | -                   | L, SCL, SL,<br>LS, CL | SC, SiL,<br>SiCL | Si, C, SiC | G, S      |
| Depth (D)                    | cm                  | > 100                 | 100–50           | 50–25      | < 25      |
| Topography (FF)              | %                   | < 2                   | 2–4              | 4–6        | > 6       |
| Surface stoniness (SS)       | %                   | < 20                  | 20–35            | 35–55      | > 55      |
| Hard pan (HP)                | cm                  | > 100                 | 100–50           | 50–20      | < 20      |
| Hydraulic conductivity (HC)  | cm h <sup>-1</sup>  | < 0.5                 | 0.5–2            | 2–6.25     | > 6.25    |
| Water holding capacity (WHC) | %                   | > 50                  | 50–20            | 20–15      | < 15      |
| Fertility properties         |                     |                       |                  |            |           |
| SOM                          | g Kg <sup>-1</sup>  | > 20                  | 10–20            | 5–10       | < 5       |
| N                            | mg Kg <sup>-1</sup> | > 80                  | 80–40            | 40–20      | < 20      |
| P                            | mg Kg <sup>-1</sup> | > 15                  | 15–10            | 10–5       | < 5       |
| K                            | mg Kg <sup>-1</sup> | > 400                 | 400–200          | 200–100    | < 100     |
| Zn                           | mg Kg <sup>-1</sup> | > 1                   | 1–0.5            | 0.5–0.25   | < 0.25    |

**Table S2.** CSI range of study area

| Index | Values      | Symbol | Classes                       |
|-------|-------------|--------|-------------------------------|
| CSI   | ≥ 0.62      | CSI 1  | High chemical suitability     |
|       | 0.50 – 0.61 | CSI 2  | Moderate chemical suitability |
|       | 0.39 – 0.49 | CSI 3  | Low chemical suitability      |
|       | ≤ 0.38      | CSI 4  | Very Low chemical suitability |

**Table S3.** PSI range of study area

| Index | Values      | Symbol | Classes                       |
|-------|-------------|--------|-------------------------------|
| PSI   | ≥ 0.73      | PSI 1  | High physical suitability     |
|       | 0.67 – 0.72 | PSI 2  | Moderate physical suitability |
|       | 0.61 – 0.66 | PSI 3  | Low physical suitability      |
|       | ≤ 0.60      | PSI 4  | Very Low physical suitability |

**Table S4.** FSI range of study area

| Index | Values      | Symbol | Classes                        |
|-------|-------------|--------|--------------------------------|
| FSI   | $\geq 0.61$ | FSI 1  | High fertility suitability     |
|       | 0.43 – 0.60 | FSI 2  | Moderate fertility suitability |
|       | 0.25 – 0.42 | FSI 3  | Low fertility suitability      |
|       | $\leq 0.24$ | FSI 4  | Very Low fertility suitability |

**Table S5.** FCSI range of study area

| Index | Values      | Symbol | Classes           |
|-------|-------------|--------|-------------------|
| FCSI  | $\geq 0.67$ | FCSI 1 | High Suitable     |
|       | 0.57 – 0.66 | FCSI 2 | Moderate Suitable |
|       | 0.47 – 0.56 | FCSI 3 | Low Suitable      |
|       | $\leq 0.46$ | FCSI 4 | Unsuitable        |
